# Supplementary material for: Protocols for Adventitious Regeneration of Amelanchier alnifolia var. cusickii and Lonicera kamtschatica ‘Jugana’
Source: MDPI journal article supplement (doi:10.3390/plants10061155), 2021-06-06
Supplement: s1 [file s1]

**Supplementary Table S1.** Adventitious shoot induction rate (%) and number of induced shoots from leaves, petioles and internodal segments of *Amelanchier alnifolia* var. *cusickii* grouped according to different explants and planth growth regulators (PGR) treatments.

|                     | Shoot induction (%) | Induced shoots |
|---------------------|---------------------|----------------|
| <b>Explant</b>      |                     |                |
| Leaves              | 0.67 <sup>b</sup>   | 0.17 ± 0.167   |
| Petioles            | 1.33 <sup>b</sup>   | 1.33 ± 1.145   |
| Internodal segments | 29.33 <sup>a</sup>  | 4.05 ± 0.645   |
| <b>PGR (mg/L)</b>   |                     |                |
| 1 BAP + 0.5 IBA     | 6.67 <sup>b</sup>   | 2.17 ± 1.01    |
| 2 BAP + 0.5 IBA     | 2.67 <sup>b</sup>   | 5.67 ± 5.17    |
| 3 BAP + 0.5 IBA     | 12.00 <sup>b</sup>  | 3.80 ± 0.99    |
| 1 TDZ + 0.5 IBA     | 9.33 <sup>b</sup>   | 1.25 ± 0.25    |
| 2 TDZ + 0.5 IBA     | 22.67 <sup>a</sup>  | 2.95 ± 0.58    |
| 3 TDZ + 0.5 IBA     | 10.67 <sup>b</sup>  | 5.30 ± 2.20    |

Different letters (a-b) indicate significant differences by LSD test ( $p \leq 0.05$ ) in the same column. Induced shoots are presented as the means ± standard error.

**Supplementary Table S2.** Adventitious shoot induction rate (%) and number of induced shoots from leaves, petioles and internodal segments of *Lonicera kamtschatica* 'Jugana' grouped according to different explants and planth growth regulators (PGR) treatments.

|                             | Shoot induction (%) |                            | Induced shoots |
|-----------------------------|---------------------|----------------------------|----------------|
| <b>Explant</b>              |                     |                            |                |
| Leaves                      | 0.57 <sup>a</sup>   |                            | 0.29 ± 0.29    |
| Petioles                    | 4.57 <sup>a</sup>   |                            | 1.64 ± 0.61    |
| Internodal segments         | 4.00 <sup>a</sup>   |                            | 2.82 ± 0.83    |
| <b>PGR (mg/L)</b>           |                     | <b>Leaves</b>              |                |
| 1 BAP + 0.2 IAA             | 4.00 <sup>ab</sup>  | BAP                        | 0.00 ± 0.00    |
| 2 BAP + 0.2 IAA             | 0.00 <sup>b</sup>   | TDZ                        | 0.67 ± 0.67    |
| 3 BAP + 0.2 IAA             | 0.00 <sup>b</sup>   | <b>Petioles</b>            |                |
| 0.5 BAP + 1.5 KIN + 0.2 IAA | 2.66 <sup>ab</sup>  | BAP                        | 0.67 ± 0.21    |
| 1 TDZ + 0.2 IAA             | 8.00 <sup>a</sup>   | TDZ                        | 2.80 ± 1.16    |
|                             |                     | <b>Internodal segments</b> |                |
| 2 TDZ + 0.2 IAA             | 5.33 <sup>ab</sup>  | BAP                        | 0.25 ± 0.25    |
| 3 TDZ + 0.2 IAA             | 1.33 <sup>b</sup>   | TDZ                        | 4.29 ± 0.89    |

Different letters (a-b) indicate significant differences by LSD test ( $p \leq 0.05$ ) in the same column. Induced shoots are presented as the means ± standard error.
